# Supplementary material for: Risk Stratification for Postoperative Acute Kidney Injury in Major Noncardiac Surgery Using Preoperative and Intraoperative Data
Source: PubMed Central journal article supplement (PMC6902769; doi:10.1001/jamanetworkopen.2019.16921), 2019-12-06
Supplement: jamanetwopen-2-e1916921-s001.pdf [file jamanetwopen-2-e1916921-s001.pdf]

## Supplementary Online Content

Lei VJ, Luong T, Shan E, et al. Risk stratification for postoperative acute kidney injury in major noncardiac surgery using preoperative and intraoperative data. *JAMA Netw Open*. 2019;2(12):e1916921. doi:10.1001/jamanetworkopen.2019.16921

**eMethods.** Detailed Methods

**eAppendix.** Variables

**eTable 1.** Rates of Missing Data in Variables

**eTable 2.** Extended Clinical Outcomes in the Model Derivation, Validation, and Test Sets

**eTable 3.** Full Model Performance in the Model Derivation, Validation, and Test Sets

**eFigure.** Model Calibration Curves

**eTable 4.** Logistic Regression With Elastic Net Selection Estimates Using Prehospitalization Data

**eTable 5.** Logistic Regression With Elastic Net Selection Estimates Using Preoperative Data

**eTable 6.** Logistic Regression With Elastic Net Selection Estimates Using Perioperative Data

**eTable 7.** Feature Importance for Random Forest and Gradient Boosting Machine Models

**eTable 8.** Super Learner Model Performance for Acute Kidney Injury

**eTable 9.** Model Performance for Acute Kidney Injury When Setting Extreme Covariate Values to Missing

**eTable 10.** Model Performance in Top 3 Surgical Subgroups in Test Dataset

**eTable 11.** Model Results by Acute Kidney Injury Definition and Modeling Approach

**eTable 12.** Acute Kidney Injury Risk Stratification Using Alternate Definitions of High Risk in Test Dataset – Rates of Clinical Outcomes by Variable Group

**eReferences**

This supplementary material has been provided by the authors to give readers additional information about their work.

## eMethods. Detailed Methods

### Study Sample

**Inclusion Criteria:** Individuals (1) age 18 or greater; (2) recorded inpatient hospital admission; (3) undergoing a major noncardiac surgery

**Exclusion Criteria:** Individuals with (1) multiple major surgeries during hospitalization; (2) did not have at least one preoperative and postoperative serum creatinine (SCr) measurement; (3) end stage renal disease (ESRD) undergoing dialysis within the past year\*; (4) high baseline SCr of 4.5 mg/dl or greater (because clinical criteria for AKI based on SCr elevation may not apply to these patients); or (5) experienced acute kidney injury up to seven days before surgery

### CONSORT Diagram

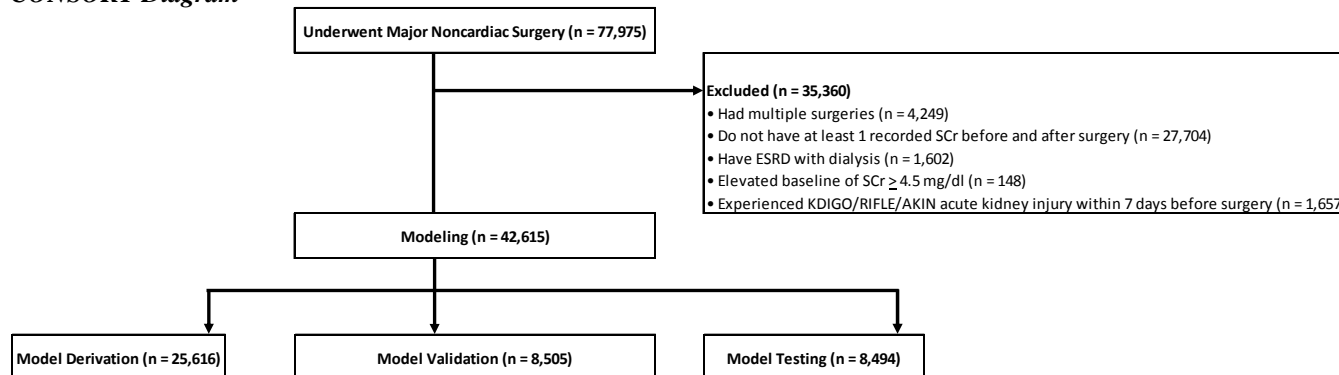

**Abbreviations:** SCr, serum creatinine; ESRD, End stage renal disease; KDIGO, Kidney Disease: Improve Global Outcomes; RIFLE, Risk, Injury, Failure, Loss of kidney function, End stage kidney disease; AKIN, Acute Kidney Injury Network

### \*Exclusion criteria: Billing Codes for ESRD undergoing Dialysis<sup>1</sup>

Patients were excluded from the study if they previously had a diagnosis or billing code within 1 year of index hospitalization.

### ICD-9-CM Diagnosis Codes

- 585.6 End stage renal disease
- 996.81 Complications of transplanted kidney
- V42.0 Kidney replaced by transplant
- V45.1 Postsurgical renal dialysis status
- V56.0 Encounter for extracorporeal dialysis
- V56.1 Fitting and adjustment of extracorporeal dialysis catheter
- V56.2 Fitting and adjustment of peritoneal dialysis catheter
- V56.3 Encounter for adequacy testing for dialysis
- V56.31 Encounter for adequacy testing for hemodialysis
- V56.32 Encounter for adequacy testing for peritoneal dialysis
- V56.8 Encounter for other dialysis
- E879.1 Kidney dialysis as the cause of abnormal reaction of patient, or of later complication, without mention of misadventure at time of procedure

### ICD-10-CM Diagnosis Codes

- T86.10 Unspecified complication of kidney transplant
- T86.11 Kidney transplant rejection
- T86.12 Kidney transplant failure
- T86.13 Kidney transplant infection
- T86.19 Other complication of kidney transplant
- Z99.2 Dependence on renal dialysis

### CPT Procedure Codes

- 90935 Hemodialysis one evaluation
- 90937 Hemodialysis repeated eval
- 90940 Hemodialysis access study
- 90945 Dialysis one evaluation

90947 Dialysis repeated eval  
 90951 ESRD serv 4 visits p mo <2yr  
 90952 ESRD serv 2-3 vsts p mo <2yr  
 90953 ESRD serv 1 visit p mo <2yrs  
 90954 ESRD serv 4 vsts p mo 2-11  
 90955 ESRD srv 2-3 vsts p mo 2-11  
 90956 ESRD srv 1 visit p mo 2-11  
 90957 ESRD srv 4 vsts p mo 12-19  
 90958 ESRD srv 2-3 vsts p mo 12-19  
 90959 ESRD serv 1 vst p mo 12-19  
 90960 ESRD srv 4 visits p mo 20+  
 90961 ESRD srv 2-3 vsts p mo 20+  
 90962 ESRD serv 1 visit p mo 20+  
 90963 ESRD home pt serv p mo <2yrs  
 90964 ESRD home pt serv p mo 2-11  
 90965 ESRD home pt serv p mo 12-19  
 90966 ESRD home pt serv p mo 20+  
 90967 ESRD home pt serv p day <2  
 90968 ESRD home pt srv p day 2-11  
 90969 ESRD home pt srv p day 12-19  
 90970 ESRD home pt serv p day 20+  
 90989 Dialysis training complete  
 90993 Dialysis training incompl  
 90997 Hemoperfusion  
 90999 Dialysis procedure

### ***Secondary Outcomes***

Secondary outcomes included inpatient dialysis, a post-surgical length of stay  $\geq 7$  days (to reflect a prolonged post-surgical stay), and all-cause in-hospital death. Inpatient dialysis was identified if a procedure code in the list below was present during index hospitalization. The post-surgical length of stay threshold of  $\geq 7$  days was selected as a marker for prolonged length of stay. In the absence of a well-defined threshold in the literature, we selected 7 days after surgery because it aligned with our post-operative AKI definition (which was defined up to 7 days after surgery). All-cause in-hospital death was defined as patient death anytime between the end of surgery and before discharge of index hospitalization.

### ***Inpatient Dialysis Procedure Codes***

#### *ICD-9-PCS Procedure Codes*

39.95 Hemodialysis

#### *ICD-10-PCS Procedure Codes*

5A1D60Z Performance of Urinary Filtration, Multiple  
 5A1D70Z Performance of Urinary Filtration, Intermittent, Less than 6 Hours Per Day  
 5A1D00Z Performance of Urinary Filtration, Single  
 5A1D90Z Performance of Urinary Filtration, Continuous, Greater than 18 hours Per Day  
 5A1D80Z Performance of Urinary Filtration, Prolonged Intermittent, 6-18 hours Per Day

## ***Sensitivity Analyses***

We tested the sensitivity of our results to several data and modeling decisions.

### ***1) Ensembling Models - Super Learner***

In response to an editor's comment, we examined the performance difference between our models and an ensemble technique like Super Learner,<sup>2</sup> which are beginning to become more common. Algorithms chosen for analysis were penalized logistic regression (glmnet), gradient boosting machine (gbm), XGboost (xgboost), and random forest (randomForest).

### ***2) Alternate Method Handling for Extreme and Artifact Values***

In response to an editor's comment, we test whether results were sensitive to treating outlier and extreme variable data as missing instead of our main approach. Values below the 1st percentile and values greater than the 99th percentile were set to missing for this analysis. All modeling and analysis were consistent otherwise.

### ***3) Surgical Subgroup Analysis***

In response to a reviewer comment, we examine if model performance differed by surgical specialty-specific models. Models were trained and tested in each respective subgroups. Results were compared to the main analysis.

### ***4) Alternate Acute Kidney Injury Definitions***

To address multiple definitions of AKI by professional societies, we also used two other definitions: (1) Risk, Injury, and Failure; and Loss; and End-stage kidney disease (RIFLE)<sup>3</sup> classification of risk--developed by Acute Dialysis Quality Initiative--was defined as an increase of SCr by 1.5 times, or estimated glomerular filtration rate (eGFR) decrease by 25%, and (2) Acute Kidney Injury Network (AKIN) stage 1 was defined as an absolute increase in serum creatinine by 0.3 mg/dl (26.4  $\mu$ mol/l) or a 50% increase in serum creatinine (i.e. 1.5-fold from baseline).<sup>4</sup> eGFR was calculated using the Chronic Kidney Disease Epidemiology Collaboration (CKD-EPI) equation.<sup>5</sup> Models for main analysis will be reproduced with the two alternate definitions of AKI.

### ***5) High Risk Stratification Cutoff Analysis***

Given the lack of an evidence-based definition of a high-risk probability value for AKI, the top 20% was arbitrarily selected and we examined sensitivity to cutoff by used top 10% and top 30%.

## **eAppendix. Variables**

A total of 339 baseline, preoperative, and intraoperative variables were constructed. Final models in main and sensitivity analyses were derived using a set of components of these variables. All categorical variables were one-hot encoded to unique binary variables.

### **Baseline Variables (35)**

Age, sex, marital status, race, insurance, Elixhauser comorbidities (30)<sup>6</sup>

### **Preoperative Variables (274)**

Last known laboratory measurement value up to 30 days (26; NT-proBNP, creatine kinase, GFR non-African American, glucose POC, glucose level, sodium level, potassium level, chloride level, creatinine level, blood urea nitrogen, bicarbonate venous, whole blood glucose, hemoglobin, hematocrit, white blood cell, red blood cell, platelet count, alanine aminotransferase, bilirubin total, aspartate aminotransferase, alkaline phosphatase, bilirubin direct, bilirubin indirect, international normalization ratio, prothrombin time, partial thromboplastin time); labs ordered (2; troponin-I point of care, troponin-T); ASA physical status; Agency for Healthcare Research and Quality Healthcare Cost and Utilization Project's Clinical Classification Software for Procedures (244)<sup>7</sup>; High Risk Surgery<sup>8</sup>

### **Intraoperative Variables (30)**

Time to surgery (min); surgery duration (min); urine output (ml); total of crystalloid administration (ml); estimated blood loss (ml); arterial line placement; Minutes under mean arterial pressure of 50; Minutes under mean arterial pressure of 60; Intraoperative fluid administration (5; platelets, fresh frozen plasma, packed red blood cells, salvaged red blood cells, whole blood autologous); Total dose medication in milligrams (5; epinephrine, phenylephrine, norepinephrine, ephedrine, vasopressin); Intraoperative medication administration (3; sodium bicarbonate, atropine, calcium chloride); Lowest recorded vital sign value (4; heart rate, mean arterial pressure, systolic blood pressure, diastolic blood pressure); Highest recorded vital sign value (4; heart rate, mean arterial pressure, systolic blood pressure, diastolic blood pressure); Mean (calculated) vital sign value (4; heart rate, mean arterial pressure, systolic blood pressure, diastolic blood pressure); Delta (Highest – Lowest) vital sign value (3; heart rate, systolic blood pressure, diastolic blood pressure)

**eTable 1. Rates of Missing Data in Variables**

The number of observations with missing data for variables were calculated in the study sample (n = 42,615). The table below shows the number of observations with missing data only for the variables that contain missing data.

| Source                 | Variable                                       | Data Type  | Number of Observations with Missing Values | % Observations with Missing Values |
|------------------------|------------------------------------------------|------------|--------------------------------------------|------------------------------------|
| Preoperative           | NT-proBNP                                      | continuous | 40,227                                     | 98.6                               |
| Preoperative           | Creatine Kinase                                | continuous | 39,900                                     | 97.8                               |
| Preoperative           | GFR Non-African American                       | continuous | 11,716                                     | 28.7                               |
| Preoperative           | Glucose POC                                    | continuous | 39,650                                     | 97.2                               |
| Preoperative           | Glucose Level                                  | continuous | 3,596                                      | 8.8                                |
| Preoperative           | Sodium Level                                   | continuous | 4,109                                      | 10.1                               |
| Preoperative           | Potassium Level                                | continuous | 4,248                                      | 10.4                               |
| Preoperative           | Chloride Level                                 | continuous | 4,265                                      | 10.5                               |
| Preoperative           | Creatinine Level                               | continuous | 4,063                                      | 10.0                               |
| Preoperative           | Blood Urea Nitrogen                            | continuous | 4,078                                      | 10.0                               |
| Preoperative           | Bicarbonate Venous                             | continuous | 37,846                                     | 92.8                               |
| Preoperative           | Whole Blood Glucose                            | continuous | 38,227                                     | 93.7                               |
| Preoperative           | Hemoglobin                                     | continuous | 3,911                                      | 9.6                                |
| Preoperative           | Hematocrit                                     | continuous | 3,909                                      | 9.6                                |
| Preoperative           | White Blood Cell                               | continuous | 4,271                                      | 10.5                               |
| Preoperative           | Red Blood Cell                                 | continuous | 4,268                                      | 10.5                               |
| Preoperative           | Platelet Count                                 | continuous | 3,988                                      | 9.8                                |
| Preoperative           | Alanine Aminotransferase                       | continuous | 18,206                                     | 44.6                               |
| Preoperative           | Bilirubin Total                                | continuous | 18,150                                     | 44.5                               |
| Preoperative           | Aspartate Aminotransferase                     | continuous | 18,216                                     | 44.7                               |
| Preoperative           | Alkaline Phosphatase                           | continuous | 18,171                                     | 44.6                               |
| Preoperative           | Bilirubin Direct                               | continuous | 34,135                                     | 83.7                               |
| Preoperative           | Bilirubin Indirect                             | continuous | 34,170                                     | 83.8                               |
| Preoperative           | International Normalization Ratio              | continuous | 8,473                                      | 20.8                               |
| Preoperative           | Prothrombin Time                               | continuous | 8,475                                      | 20.8                               |
| Preoperative           | Partial Thromboplastin Time                    | continuous | 8,948                                      | 21.9                               |
| Intraoperative         | Max estimated blood loss                       | continuous | 9,410                                      | 23.1                               |
| Intraoperative         | Max urine output                               | continuous | 15,784                                     | 38.7                               |
| Intraoperative         | Min heart rate                                 | continuous | 23                                         | 0.1                                |
| Intraoperative         | Max heart rate                                 | continuous | 23                                         | 0.1                                |
| Intraoperative         | Mean heart rate                                | continuous | 23                                         | 0.1                                |
| Intraoperative         | Delta heart rate                               | continuous | 23                                         | 0.1                                |
| Intraoperative         | Min systolic blood pressure                    | continuous | 369                                        | 0.9                                |
| Intraoperative         | Max systolic blood pressure                    | continuous | 369                                        | 0.9                                |
| Intraoperative         | Mean systolic blood pressure                   | continuous | 369                                        | 0.9                                |
| Intraoperative         | Delta systolic blood pressure                  | continuous | 369                                        | 0.9                                |
| Intraoperative         | Min diastolic blood pressure                   | continuous | 376                                        | 0.9                                |
| Intraoperative         | Max diastolic blood pressure                   | continuous | 376                                        | 0.9                                |
| Intraoperative         | Mean diastolic blood pressure                  | continuous | 376                                        | 0.9                                |
| Intraoperative         | Delta diastolic blood pressure                 | continuous | 376                                        | 0.9                                |
| Intraoperative         | Min mean arterial pressure                     | continuous | 21                                         | 0.1                                |
| Intraoperative         | Max mean arterial pressure                     | continuous | 21                                         | 0.1                                |
| Intraoperative         | Mean mean arterial pressure                    | continuous | 21                                         | 0.1                                |
| Intraoperative         | Minutes under mean arterial pressure of 50mmHg | continuous | 21                                         | 0.1                                |
| Intraoperative         | Minutes under mean arterial pressure of 60mmHg | continuous | 21                                         | 0.1                                |
| Elixhauser Comorbidity | AIDS HIV                                       | binary     | 244                                        | 0.6                                |
| Elixhauser Comorbidity | Alcohol abuse                                  | binary     | 244                                        | 0.6                                |
| Elixhauser Comorbidity | Blood loss anemia                              | binary     | 244                                        | 0.6                                |
| Elixhauser Comorbidity | Cardiac arrhythmias                            | binary     | 244                                        | 0.6                                |
| Elixhauser Comorbidity | Chronic pulmonary disorders                    | binary     | 244                                        | 0.6                                |

|                        |                                                |        |     |     |
|------------------------|------------------------------------------------|--------|-----|-----|
| Elixhauser Comorbidity | Coagulopathy                                   | binary | 244 | 0.6 |
| Elixhauser Comorbidity | Congestive heart failure                       | binary | 244 | 0.6 |
| Elixhauser Comorbidity | Deficiency anemia                              | binary | 244 | 0.6 |
| Elixhauser Comorbidity | Depression                                     | binary | 244 | 0.6 |
| Elixhauser Comorbidity | Diabetes, complicated                          | binary | 244 | 0.6 |
| Elixhauser Comorbidity | Diabetes, uncomplicated                        | binary | 244 | 0.6 |
| Elixhauser Comorbidity | Drug abuse                                     | binary | 244 | 0.6 |
| Elixhauser Comorbidity | Fluid and electrolyte disorders                | binary | 244 | 0.6 |
| Elixhauser Comorbidity | Hypertension, complicated                      | binary | 244 | 0.6 |
| Elixhauser Comorbidity | Hypertension, uncomplicated                    | binary | 244 | 0.6 |
| Elixhauser Comorbidity | Hypothyroidism                                 | binary | 244 | 0.6 |
| Elixhauser Comorbidity | Liver disease                                  | binary | 244 | 0.6 |
| Elixhauser Comorbidity | Lymphoma                                       | binary | 244 | 0.6 |
| Elixhauser Comorbidity | Metastatic cancer                              | binary | 244 | 0.6 |
| Elixhauser Comorbidity | Obesity                                        | binary | 244 | 0.6 |
| Elixhauser Comorbidity | Other neurological disorders                   | binary | 244 | 0.6 |
| Elixhauser Comorbidity | Paralysis                                      | binary | 244 | 0.6 |
| Elixhauser Comorbidity | Peptic ulcer disease                           | binary | 244 | 0.6 |
| Elixhauser Comorbidity | Peripheral vascular disorders                  | binary | 244 | 0.6 |
| Elixhauser Comorbidity | Psychoses                                      | binary | 244 | 0.6 |
| Elixhauser Comorbidity | Pulmonary circulation                          | binary | 244 | 0.6 |
| Elixhauser Comorbidity | Rheumatoid arthritis/collagen vascular disease | binary | 244 | 0.6 |
| Elixhauser Comorbidity | Solid tumor without metastasis                 | binary | 244 | 0.6 |
| Elixhauser Comorbidity | Valvular disease                               | binary | 244 | 0.6 |
| Elixhauser Comorbidity | Weight loss                                    | binary | 244 | 0.6 |

**eTable 2. Extended Clinical Outcomes in the Model Derivation, Validation, and Test Sets**

Primary and secondary clinical outcomes of the 42,615 patients who underwent major noncardiac surgery.

| Clinical Outcome                   | Set                        |                            |                           |                     |
|------------------------------------|----------------------------|----------------------------|---------------------------|---------------------|
|                                    | All Visits<br>(n = 42,615) | Derivation<br>(n = 25,616) | Validation<br>(n = 8,505) | Test<br>(n = 8,494) |
| KDIGO Acute Kidney Injury, No. (%) | 4,318 (10.1)               | 2,655 (10.4)               | 818 (9.6)                 | 845 (10)            |
| RIFLE Acute Kidney Injury, No. (%) | 4,206 (9.9)                | 2,543 (9.9)                | 806 (9.5)                 | 857 (10.1)          |
| AKIN Acute Kidney Injury, No. (%)  | 4,177 (9.8)                | 2,574 (10.1)               | 784 (9.2)                 | 819 (9.6)           |
| Inpatient Dialysis, No. (%)        | 103 (0.2)                  | 54 (0.2)                   | 17 (0.2)                  | 32 (0.4)            |
| Prolonged Length of Stay, No. (%)  | 8,335 (19.6)               | 5,032 (19.6)               | 1,634 (19.2)              | 1,669 (19.7)        |
| In-Hospital Death, No. (%)         | 255 (0.6)                  | 157 (0.6)                  | 40 (0.5)                  | 58 (0.7)            |

**Abbreviations:** KDIGO, Kidney Disease: Improve Global Outcomes; RIFLE, Risk, Injury, Failure, Loss of kidney function, End stage kidney disease; AKIN, Acute Kidney Injury Network



**eTable 3. Full Model Performance in the Model Derivation, Validation, and Test Sets**

| <b>Models</b>                                  | <b>Derivation Set<br/>(n = 25,616),<br/>AUC (95% CI)</b> | <b>Validation Set<br/>(n = 8,505),<br/>AUC (95% CI)</b> | <b>Test Set<br/>(n = 8,494),<br/>AUC (95% CI)</b> |
|------------------------------------------------|----------------------------------------------------------|---------------------------------------------------------|---------------------------------------------------|
| Logistic Regression with Elastic Net Selection |                                                          |                                                         |                                                   |
| Prehospitalization                             | 0.695 (0.685, 0.706)                                     | 0.706 (0.687, 0.725)                                    | 0.700 (0.681, 0.719)                              |
| Preoperative                                   | 0.765 (0.756, 0.775)                                     | 0.779 (0.762, 0.796)                                    | 0.782 (0.765, 0.799)                              |
| Perioperative                                  | 0.777 (0.767, 0.786)                                     | 0.784 (0.767, 0.801)                                    | 0.790 (0.773, 0.807)                              |
| Random Forest                                  |                                                          |                                                         |                                                   |
| Prehospitalization                             | 0.740 (0.731, 0.750)                                     | 0.712 (0.693, 0.730)                                    | 0.710 (0.691, 0.728)                              |
| Preoperative                                   | 0.924 (0.920, 0.928)                                     | 0.789 (0.771, 0.807)                                    | 0.787 (0.769, 0.803)                              |
| Perioperative                                  | 0.951 (0.948, 0.954)                                     | 0.805 (0.789, 0.820)                                    | 0.808 (0.792, 0.824)                              |
| Gradient Boosting Machine                      |                                                          |                                                         |                                                   |
| Prehospitalization                             | 0.725 (0.714, 0.735)                                     | 0.713 (0.694, 0.731)                                    | 0.712 (0.695, 0.731)                              |
| Preoperative                                   | 0.825 (0.817, 0.833)                                     | 0.803 (0.787, 0.819)                                    | 0.804 (0.788, 0.819)                              |
| Perioperative                                  | 0.848 (0.841, 0.855)                                     | 0.812 (0.797, 0.829)                                    | 0.817 (0.802, 0.832)                              |

**Abbreviations:** AUC, Area under the receiver operating characteristics curve; CI, confidence interval

**eFigure. Model Calibration Curves**

Model calibration curves for each model is plotted below for the outcome acute kidney injury in test dataset (n = 8,494).

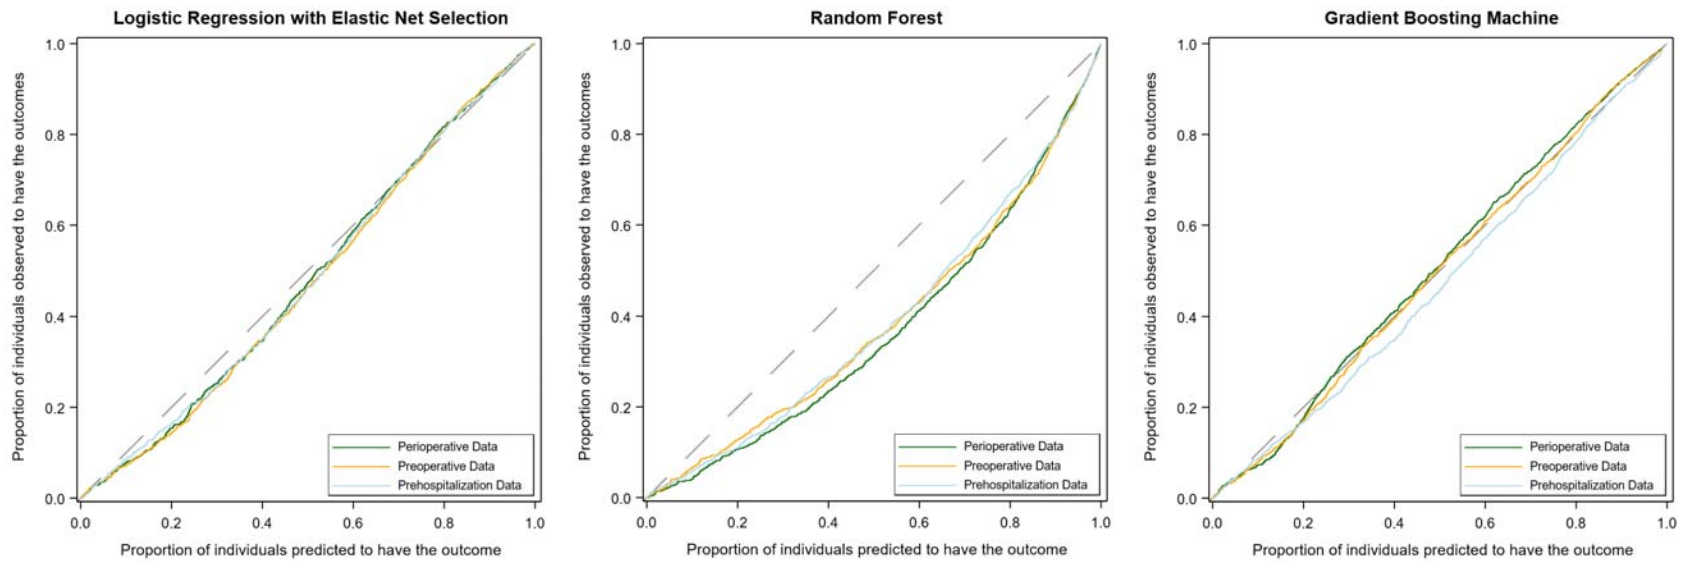

**eTable 4. Logistic Regression with Elastic Net Selection Estimates using Prehospitalization Data**

The final model for the logistic regression with elastic net selection using prehospitalization data (which includes prehospitalization and preoperative data) consisted of 42 variables.

| Variable Group     | Variable Name                              | Type        | Reference  | Odds Ratio (95% CI) | p-value |
|--------------------|--------------------------------------------|-------------|------------|---------------------|---------|
|                    | Intercept                                  |             | N/A        | 0.02(0.02, 0.03)    | <.001   |
| Prehospitalization | Age                                        | Continuous  | N/A        | 1.02(1.01, 1.02)    | <.001   |
|                    | Gender: MALE                               | Binary      | FEMALE     | 1.36(1.24, 1.49)    | <.001   |
|                    | Marital Status: OTHER/UNKNOWN              | Categorical | MARRIED    | 1.06(0.94, 1.19)    | 0.347   |
|                    | Marital Status: SINGLE                     | Categorical | MARRIED    | 1.07(0.96, 1.2)     | 0.22    |
|                    | Race: BLACK OR AFRICAN AMERICAN            | Categorical | WHITE      | 1.23(1.1, 1.37)     | <.001   |
|                    | Race: ASIAN                                | Categorical | WHITE      | 0.87(0.62, 1.2)     | 0.39    |
|                    | Race: OTHER/UNKNOWN                        | Categorical | WHITE      | 1.3(1.09, 1.55)     | 0.004   |
|                    | Insurance: MEDICAID                        | Categorical | COMMERCIAL | 1.21(1.04, 1.41)    | 0.013   |
|                    | Insurance: MEDICARE                        | Categorical | COMMERCIAL | 1.23(1.1, 1.38)     | <.001   |
|                    | Insurance: OTHER                           | Categorical | COMMERCIAL | 4.43(3.38, 5.8)     | <.001   |
|                    | Elixhauser_AIDS_HIV                        | Binary      | No         | 0.5(0.26, 0.97)     | 0.039   |
|                    | Elixhauser_Alcohol_abuse                   | Binary      | No         | 1.09(0.81, 1.46)    | 0.579   |
|                    | Elixhauser_Blood_loss_anemia               | Binary      | No         | 0.99(0.7, 1.4)      | 0.963   |
|                    | Elixhauser_Cardiac_arrhythmias             | Binary      | No         | 1.06(0.93, 1.21)    | 0.376   |
|                    | Elixhauser_Chronic_pulmonary_disease       | Binary      | No         | 1.21(1.06, 1.38)    | 0.006   |
|                    | Elixhauser_Coagulopathy                    | Binary      | No         | 1.09(0.87, 1.37)    | 0.455   |
|                    | Elixhauser_Congestive_heart_failure        | Binary      | No         | 1.58(1.31, 1.9)     | <.001   |
|                    | Elixhauser_Deficiency_anemia               | Binary      | No         | 1.14(0.9, 1.46)     | 0.282   |
|                    | Elixhauser_Depression                      | Binary      | No         | 0.82(0.7, 0.96)     | 0.016   |
|                    | Elixhauser_Diabetes_complicated            | Binary      | No         | 1.01(0.84, 1.22)    | 0.924   |
|                    | Elixhauser_Diabetes_uncomplicated          | Binary      | No         | 1.04(0.9, 1.2)      | 0.619   |
|                    | Elixhauser_Drug_abuse                      | Binary      | No         | 0.81(0.61, 1.07)    | 0.142   |
|                    | Elixhauser_Fluid_and_electrolyte_disorders | Binary      | No         | 1.36(1.18, 1.58)    | <.001   |
|                    | Elixhauser_Hypertension_complicated        | Binary      | No         | 0.91(0.73, 1.13)    | 0.399   |
|                    | Elixhauser_Hypertension_uncomplicated      | Binary      | No         | 1.02(0.92, 1.13)    | 0.760   |
|                    | Elixhauser_Hypothyroidism                  | Binary      | No         | 0.94(0.8, 1.11)     | 0.465   |
|                    | Elixhauser_Liver_disease                   | Binary      | No         | 2.19(1.83, 2.63)    | <.001   |
|                    | Elixhauser_Lymphoma                        | Binary      | No         | 1.19(0.84, 1.7)     | 0.321   |
|                    | Elixhauser_Metastatic_cancer               | Binary      | No         | 0.87(0.71, 1.07)    | 0.191   |
|                    | Elixhauser_Obesity                         | Binary      | No         | 0.99(0.87, 1.12)    | 0.828   |
|                    | Elixhauser_Other_neurological_disorders    | Binary      | No         | 0.75(0.6, 0.94)     | 0.011   |
|                    | Elixhauser_Paralysis                       | Binary      | No         | 0.93(0.59, 1.44)    | 0.735   |
|                    | Elixhauser_Peptic_ulcer_disease            | Binary      | No         | 0.87(0.56, 1.36)    | 0.542   |
|                    | Elixhauser_Peripheral_vascular_disease     | Binary      | No         | 1.01(0.87, 1.19)    | 0.856   |
|                    | Elixhauser_Psychoses                       | Binary      | No         | 1.01(0.58, 1.74)    | 0.982   |
|                    | Elixhauser_Pulmonary_circulation           | Binary      | No         | 1.28(1.02, 1.59)    | 0.031   |
|                    | Elixhauser_Renal_failure                   | Binary      | No         | 2.59(2.14, 3.14)    | <.001   |
|                    | Elixhauser_Rheumatoid_arthritis            | Binary      | No         | 0.93(0.74, 1.18)    | 0.552   |
|                    | Elixhauser_Solid_tumor_without_metastasis  | Binary      | No         | 1.43(1.28, 1.6)     | <.001   |
|                    | Elixhauser_Valvular_disease                | Binary      | No         | 0.98(0.82, 1.17)    | 0.82    |
|                    | Elixhauser_Weight_loss                     | Binary      | No         | 1.21(1, 1.47)       | 0.049   |
|                    | missing_Hxdiagnosis                        | Binary      | No         | 1(0.54, 1.84)       | 0.995   |

**eTable 5. Logistic Regression with Elastic Net Selection Estimates using Preoperative Data**

The final model for the logistic regression with elastic net selection using preoperative data (which includes prehospitalization and preoperative data) consisted of 14 variables.

| Variable Group     | Variable Name                                        | Type       | Reference | Odds Ratio (95% CI) | p-value |
|--------------------|------------------------------------------------------|------------|-----------|---------------------|---------|
|                    | Intercept                                            |            | N/A       | 0.21(0.11, 0.38)    | <.001   |
| Prehospitalization | Age                                                  | Continuous | N/A       | 1.01(1.01, 1.01)    | <.001   |
|                    | Elixahuser_Congestive_Heart_Failure                  | Binary     | No        | 1.45(1.22, 1.72)    | <.001   |
|                    | Elixahuser_Liver_disease                             | Binary     | No        | 1.51(1.24, 1.83)    | <.001   |
|                    | Elixahuser_Renal_failure                             | Binary     | No        | 1.67(1.41, 1.97)    | <.001   |
| Preoperative       | GFR_Non_African_American                             | Continuous | N/A       | 0.97(0.97, 0.98)    | <.001   |
|                    | Blood_Urea_Nitrogen                                  | Continuous | N/A       | 1.01(1.01, 1.02)    | <.001   |
|                    | Hemoglobin                                           | Continuous | N/A       | 0.88(0.86, 0.91)    | <.001   |
|                    | International_Normal_Ratio                           | Continuous | N/A       | 1.44(1.19, 1.74)    | <.001   |
|                    | CCS_Nephrectomy_partial_or_complete                  | Binary     | No        | 18.42(14.15, 23.98) | <.001   |
|                    | CCS_Other_OR_therapeutic_procedures_of_urinary_tract | Binary     | No        | 3.3(2.36, 4.62)     | <.001   |
|                    | CCS_Other_organ_transplantation                      | Binary     | No        | 5.11(3.68, 7.09)    | <.001   |
|                    | High_Risk_Surgery                                    | Binary     | No        | 1.81(1.63, 2)       | <.001   |
|                    | missing_Bilirubin_Indirect                           | Binary     | No        | 0.8(0.71, 0.9)      | 0.003   |
|                    | ASA_Physical_Status                                  | Continuous | N/A       | 1.54(1.42, 1.67)    | <.001   |

**eTable 6. Logistic Regression with Elastic Net Selection Estimates using Perioperative Data**

The final model for the logistic regression with elastic net selection using perioperative data (which includes prehospitalization, preoperative, and intraoperative data) consisted of 22 variables.

| Variable Group     | Variable Name                        | Type        | Reference  | Odds Ratio (95% CI) | p-value |
|--------------------|--------------------------------------|-------------|------------|---------------------|---------|
|                    | Intercept                            | N/A         | N/A        | 0.11(0.06, 0.2)     | <.001   |
| Prehospitalization | Age                                  | Continuous  | N/A        | 1.01(1.01, 1.02)    | <.001   |
|                    | Insurance: MEDICAID                  | Categorical | COMMERCIAL | 1.35(1.16, 1.57)    | <.001   |
|                    | Insurance: MEDICARE                  | Categorical | COMMERCIAL | 1.14(1.01, 1.28)    | 0.036   |
|                    | Insurance: OTHER                     | Categorical | COMMERCIAL | 2.2(1.65, 2.91)     | <.001   |
|                    | Elixahauser_Congestive_Heart_Failure | Binary      | No         | 1.49(1.25, 1.77)    | <.001   |
|                    | Elixahauser_Liver_disease            | Binary      | No         | 1.47(1.2, 1.79)     | <.001   |
|                    | Elixahauser_Renal_failure            | Binary      | No         | 1.76(1.48, 2.08)    | <.001   |
| Preoperative       | GFR_Non_African_American             | Continuous  | N/A        | 0.97(0.97, 0.98)    | <.001   |
|                    | Blood_Urea_Nitrogen                  | Continuous  | N/A        | 1.01(1.01, 1.02)    | <.001   |
|                    | Hemoglobin                           | Continuous  | N/A        | 0.89(0.87, 0.92)    | <.001   |
|                    | International_Normal_Ratio           | Continuous  | N/A        | 1.41(1.17, 1.71)    | <.001   |
|                    | CCS_Nephrectomy_partial_or_complete  | Binary      | No         | 13.11(10.09, 17.04) | <.001   |
|                    | CCS_Other_organ_transplantation      | Binary      | No         | 3.66(2.5, 5.35)     | <.001   |
|                    | High_Risk_Surgery                    | Binary      | No         | 1.58(1.42, 1.76)    | <.001   |
|                    | missing_Bilirubin_Indirect           | Binary      | No         | 0.82(0.72, 0.93)    | 0.002   |
|                    | ASA_Physical_Status                  | Continuous  | N/A        | 1.49(1.37, 1.62)    | <.001   |
| Intraoperative     | Time_to_surgery_min                  | Continuous  | N/A        | 1(1, 1)             | 0.002   |
|                    | max_Estimated_Blood_Loss_mL          | Continuous  | N/A        | 1(1, 1)             | <.001   |
|                    | max_Crystalloids_mL                  | Continuous  | N/A        | 1(1, 1)             | <.001   |
|                    | Fresh_Frozen_Plasma_YN               | Binary      | No         | 0.97(0.71, 1.32)    | 0.835   |
|                    | Platlets_YN                          | Binary      | No         | 1.06(0.76, 1.48)    | 0.737   |
|                    | CaCl_YN                              | Binary      | No         | 1.62(1.3, 2.03)     | <.001   |

**eTable 7. Feature Importance for Random Forest and Gradient Boosting Machine Models**

Below are the top 10 features ranked by Gini importance for the random forest and gradient boosting machine models.

| Model (# of variables)            | Top 10 Gini Importance Features            | Variable Group      | Gini coefficient   |
|-----------------------------------|--------------------------------------------|---------------------|--------------------|
| Random forest -                   | Age                                        | Prehospitalization  | 0.176              |
| Prehospitalization (35 variables) | Elixhauser Renal failure                   | Prehospitalization  | 0.110              |
|                                   | Insurance commerical                       | Prehospitalization  | 0.067              |
|                                   | Elixhauser Liver disease                   | Prehospitalization  | 0.060              |
|                                   | Insurance medicare                         | Prehospitalization  | 0.049              |
|                                   | Elixhauser Congestive Heart Failure        | Prehospitalization  | 0.048              |
|                                   | Elixhauser Solid tumor without metastasis  | Prehospitalization  | 0.045              |
|                                   | Elixhauser Fluid and electrolyte disorders | Prehospitalization  | 0.043              |
|                                   | Elixhauser Hypertension complicated        | Prehospitalization  | 0.040              |
|                                   | Insurance other                            | Prehospitalization  | 0.039              |
|                                   | Random forest -                            | Creatinine Level    | Preoperative       |
| Preoperative (309 variables)      | ASA Physical Status                        | Preoperative        | 0.083              |
|                                   | GFR Non African American                   | Preoperative        | 0.068              |
|                                   | CCS Nephrectomy partial or complete        | Preoperative        | 0.060              |
|                                   | Age                                        | Prehospitalization  | 0.060              |
|                                   | Hemoglobin                                 | Preoperative        | 0.054              |
|                                   | Red Blood Cell                             | Preoperative        | 0.045              |
|                                   | Blood Urea Nitrogen                        | Preoperative        | 0.038              |
|                                   | White Blood Cell                           | Preoperative        | 0.035              |
|                                   | Glucose Level                              | Preoperative        | 0.033              |
|                                   | Random forest -                            | ASA Physical Status | Preoperative       |
| Perioperative (339 variables)     | Creatinine Level                           | Preoperative        | 0.067              |
|                                   | GFR Non African American                   | Preoperative        | 0.057              |
|                                   | CCS Nephrectomy partial or complete        | Preoperative        | 0.046              |
|                                   | Hemoglobin                                 | Preoperative        | 0.037              |
|                                   | Age                                        | Prehospitalization  | 0.035              |
|                                   | max Crystalloids mL                        | Intraoperative      | 0.032              |
|                                   | Red Blood Cell                             | Preoperative        | 0.025              |
|                                   | max Estimated Blood Loss mL                | Intraoperative      | 0.025              |
|                                   | Surgery duration min                       | Intraoperative      | 0.025              |
|                                   | Gradient Boosting Machine -                | Age                 | Prehospitalization |
| Prehospitalization (35 variables) | Elixhauser Renal failure                   | Prehospitalization  | 0.091              |
|                                   | Insurance other                            | Prehospitalization  | 0.051              |
|                                   | Elixhauser Liver disease                   | Prehospitalization  | 0.050              |
|                                   | Elixhauser Congestive Heart Failure        | Prehospitalization  | 0.045              |
|                                   | Elixhauser Solid tumor without metastasis  | Prehospitalization  | 0.040              |
|                                   | Elixhauser Fluid and electrolyte disorders | Prehospitalization  | 0.038              |
|                                   | Sex Female                                 | Prehospitalization  | 0.030              |
|                                   | Insurance commerical                       | Prehospitalization  | 0.028              |
|                                   | Elixhauser Chronic pulmonary disease       | Prehospitalization  | 0.027              |
|                                   | Gradient Boosting Machine -                | Creatinine Level    | Preoperative       |
| Preoperative (309 variables)      | CCS Nephrectomy partial or complete        | Preoperative        | 0.046              |
|                                   | Age                                        | Prehospitalization  | 0.044              |
|                                   | Prothrombin Time                           | Preoperative        | 0.037              |
|                                   | Hemoglobin                                 | Preoperative        | 0.036              |
|                                   | Chloride Level                             | Preoperative        | 0.034              |
|                                   | Red Blood Cell                             | Preoperative        | 0.031              |
|                                   | Glucose Level                              | Preoperative        | 0.029              |
|                                   | White Blood Cell                           | Preoperative        | 0.029              |
|                                   | Sodium Level                               | Preoperative        | 0.029              |
|                                   | Gradient Boosting Machine -                | Creatinine Level    | Perioperative      |

|                               |                               |                    |       |
|-------------------------------|-------------------------------|--------------------|-------|
| Perioperative (339 variables) | CCS_104                       | Preoperative       | 0.038 |
|                               | max Estimated Blood Loss mL   | Intraoperative     | 0.033 |
|                               | Age                           | Prehospitalization | 0.032 |
|                               | Surgery duration min          | Intraoperative     | 0.026 |
|                               | Max Urine Output              | Intraoperative     | 0.023 |
|                               | mean Systolic Blood Pressure  | Intraoperative     | 0.021 |
|                               | mean Diastolic Blood Pressure | Intraoperative     | 0.021 |
|                               | Hemoglobin                    | Preoperative       | 0.020 |
|                               | White Blood Cell              | Preoperative       | 0.020 |

**eTable 8. Super Learner Model Performance for Acute Kidney Injury**

There were no meaningful differences in model performance when using an ensembling model technique like Super Learner<sup>2</sup> (eTable 3 vs. eTable 8).

| Variables                 | Algorithm                     | Super Learner Model Weight | Derivation Set, AUC (95% CI) | Validation Set, AUC (95% CI) | Test Set, AUC (95% CI) |
|---------------------------|-------------------------------|----------------------------|------------------------------|------------------------------|------------------------|
| <b>Prehospitalization</b> | Super Learner Ensemble        |                            | 0.675 (0.663, 0.686)         | 0.647 (0.628, 0.667)         | 0.651 (0.632, 0.671)   |
|                           | Random Forest                 | 0.040                      | 0.695 (0.684, 0.707)         | 0.567 (0.546, 0.587)         | 0.603 (0.583, 0.622)   |
|                           | XGBoost                       | 0.134                      | 0.713 (0.702, 0.722)         | 0.619 (0.600, 0.638)         | 0.644 (0.626, 0.664)   |
|                           | Penalized Logistic Regression | 0.574                      | 0.647 (0.635, 0.658)         | 0.647 (0.628, 0.666)         | 0.646 (0.628, 0.664)   |
|                           | Gradient Boosting Machine     | 0.252                      | 0.658 (0.647, 0.668)         | 0.643 (0.622, 0.662)         | 0.639 (0.619, 0.658)   |
| <b>Preoperative</b>       | Super Learner Ensemble        |                            | 0.988 (0.987, 0.989)         | 0.803 (0.785, 0.818)         | 0.805 (0.789, 0.820)   |
|                           | Random Forest                 | 0.318                      | 1.000 (1.000, 1.000)         | 0.783 (0.765, 0.800)         | 0.792 (0.776, 0.808)   |
|                           | XGBoost                       | 0.154                      | 0.971 (0.968, 0.974)         | 0.779 (0.763, 0.796)         | 0.780 (0.763, 0.797)   |
|                           | Penalized Logistic Regression | 0.526                      | 0.787 (0.777, 0.797)         | 0.797 (0.781, 0.813)         | 0.793 (0.777, 0.809)   |
|                           | Gradient Boosting Machine     | 0.002                      | 0.781 (0.772, 0.790)         | 0.785 (0.767, 0.802)         | 0.788 (0.772, 0.805)   |
| <b>Perioperative</b>      | Super Learner Ensemble        |                            | 0.988 (0.987, 0.989)         | 0.816 (0.801, 0.830)         | 0.822 (0.806, 0.838)   |
|                           | Random Forest                 | 0.249                      | 1.000 (1.000, 1.000)         | 0.803 (0.788, 0.819)         | 0.812 (0.797, 0.827)   |
|                           | XGBoost                       | 0.208                      | 0.984 (0.982, 0.986)         | 0.786 (0.770, 0.803)         | 0.796 (0.779, 0.811)   |
|                           | Penalized Logistic Regression | 0.401                      | 0.805 (0.797, 0.814)         | 0.812 (0.796, 0.827)         | 0.810 (0.794, 0.825)   |
|                           | Gradient Boosting Machine     | 0.142                      | 0.802 (0.792, 0.811)         | 0.801 (0.785, 0.817)         | 0.806 (0.791, 0.822)   |



**eTable 9. Model Performance for Acute Kidney Injury When Setting Extreme Covariate Values to Missing**

There were no meaningful differences in model performance when setting variable outlier data to missing (eTable 3 vs. eTable 9).

| <b>Models</b>                                  | <b>Derivation Set<br/>(n = 25,616),<br/>AUC (95% CI)</b> | <b>Validation Set<br/>(n = 8,505),<br/>AUC (95% CI)</b> | <b>Test Set<br/>(n = 8,494),<br/>AUC (95% CI)</b> |
|------------------------------------------------|----------------------------------------------------------|---------------------------------------------------------|---------------------------------------------------|
| Logistic Regression with Elastic Net Selection |                                                          |                                                         |                                                   |
| Prehospitalization                             | 0.695 (0.685, 0.706)                                     | 0.706 (0.687, 0.725)                                    | 0.700 (0.681, 0.719)                              |
| Preoperative                                   | 0.765 (0.756, 0.775)                                     | 0.779 (0.762, 0.796)                                    | 0.782 (0.765, 0.799)                              |
| Perioperative                                  | 0.769 (0.759, 0.779)                                     | 0.775 (0.758, 0.792)                                    | 0.783 (0.766, 0.800)                              |
| Random Forest                                  |                                                          |                                                         |                                                   |
| Prehospitalization                             | 0.740 (0.730, 0.750)                                     | 0.712 (0.693, 0.730)                                    | 0.710 (0.692, 0.728)                              |
| Preoperative                                   | 0.924 (0.920, 0.928)                                     | 0.788 (0.771, 0.805)                                    | 0.787 (0.770, 0.803)                              |
| Perioperative                                  | 0.966 (0.964, 0.968)                                     | 0.799 (0.783, 0.815)                                    | 0.799 (0.782, 0.814)                              |
| Gradient Boosting Machine                      |                                                          |                                                         |                                                   |
| Prehospitalization                             | 0.725 (0.714, 0.735)                                     | 0.713 (0.694, 0.731)                                    | 0.712 (0.693, 0.731)                              |
| Preoperative                                   | 0.819 (0.809, 0.827)                                     | 0.799 (0.783, 0.814)                                    | 0.803 (0.788, 0.819)                              |
| Perioperative                                  | 0.862 (0.854, 0.869)                                     | 0.808 (0.792, 0.824)                                    | 0.815 (0.801, 0.830)                              |

**eTable 10. Model Performance in Top 3 Surgical Subgroups in Test Dataset**

In response to a reviewer comment, we examined specialty-specific models (top 3 highest volume) and did find some variability, though lower sample sizes seemed like the most important reason for variation in model performance.

|                                                       | <b>All Encounters (n = 8,494)</b> |                      |  | <b>Orthopedic Surgery (n = 3,110)</b> |                      |  | <b>General Surgery (n = 1,758)</b> |                      |  | <b>Neurological Surgery (n = 1,267)</b> |                      |
|-------------------------------------------------------|-----------------------------------|----------------------|--|---------------------------------------|----------------------|--|------------------------------------|----------------------|--|-----------------------------------------|----------------------|
| <b>Models</b>                                         | <b>AKI Rate</b>                   | <b>AUC, (95% CI)</b> |  | <b>AKI Rate</b>                       | <b>AUC, (95% CI)</b> |  | <b>AKI Rate</b>                    | <b>AUC, (95% CI)</b> |  | <b>AKI Rate</b>                         | <b>AUC, (95% CI)</b> |
| <b>Logistic Regression with Elastic Net Selection</b> |                                   |                      |  |                                       |                      |  |                                    |                      |  |                                         |                      |
| Prehospitalization                                    | 0.099                             | 0.700 (0.681, 0.719) |  | 0.072                                 | 0.732 (0.697, 0.767) |  | 0.108                              | 0.660 (0.620, 0.700) |  | 0.052                                   | 0.585 (0.514, 0.656) |
| Preoperative                                          |                                   | 0.782 (0.765, 0.799) |  |                                       | 0.767 (0.733, 0.801) |  |                                    | 0.747 (0.711, 0.783) |  |                                         | 0.710 (0.642, 0.779) |
| Perioperative                                         |                                   | 0.790 (0.773, 0.807) |  |                                       | 0.767 (0.734, 0.800) |  |                                    | 0.773 (0.739, 0.807) |  |                                         | 0.692 (0.621, 0.763) |
| <b>Random Forest</b>                                  |                                   |                      |  |                                       |                      |  |                                    |                      |  |                                         |                      |
| Prehospitalization                                    | 0.099                             | 0.710 (0.691, 0.728) |  | 0.072                                 | 0.739 (0.702, 0.771) |  | 0.108                              | 0.657 (0.617, 0.697) |  | 0.052                                   | 0.625 (0.562, 0.692) |
| Preoperative                                          |                                   | 0.787 (0.769, 0.803) |  |                                       | 0.782 (0.750, 0.812) |  |                                    | 0.739 (0.706, 0.773) |  |                                         | 0.702 (0.630, 0.771) |
| Perioperative                                         |                                   | 0.808 (0.792, 0.824) |  |                                       | 0.796 (0.754, 0.816) |  |                                    | 0.772 (0.737, 0.804) |  |                                         | 0.699 (0.626, 0.765) |
| <b>Gradient Boosting Machine Models</b>               |                                   |                      |  |                                       |                      |  |                                    |                      |  |                                         |                      |
| Prehospitalization                                    | 0.099                             | 0.712 (0.695, 0.731) |  | 0.072                                 | 0.741 (0.706, 0.777) |  | 0.108                              | 0.626 (0.617, 0.698) |  | 0.052                                   | 0.624 (0.550, 0.692) |
| Preoperative                                          |                                   | 0.804 (0.788, 0.819) |  |                                       | 0.786 (0.755, 0.815) |  |                                    | 0.745 (0.709, 0.777) |  |                                         | 0.685 (0.610, 0.753) |
| Perioperative                                         |                                   | 0.817 (0.802, 0.832) |  |                                       | 0.786 (0.754, 0.816) |  |                                    | 0.775 (0.741, 0.808) |  |                                         | 0.722 (0.659, 0.780) |

**Abbreviations:** AKI, acute kidney injury; AUC, area under the receiver operating characteristic curve; CI, confidence interval

**eTable 11. Model Results by Acute Kidney Injury Definition and Modeling Approach**

When replicating models for the RIFLE and AKIN AKI definitions, the improvement in model performance across variable groups was similar to performance using the KDIGO definition. The table below shows model performance within the test data set (n = 8,494).

| Acute Kidney Injury<br>Definition and Datasets | Logistic Regression<br>with Elastic Net Selection<br>(n = 8,494) |                               | Random Forest<br>(n = 8,494) |                               | Gradient Boosting Machine<br>(n = 8,494) |                               |
|------------------------------------------------|------------------------------------------------------------------|-------------------------------|------------------------------|-------------------------------|------------------------------------------|-------------------------------|
|                                                | AUC (95% CI)                                                     | p-value for<br>AUC comparison | AUC (95% CI)                 | p-value for<br>AUC comparison | AUC (95% CI)                             | p-value for<br>AUC comparison |
| KDIGO Acute Kidney Injury                      |                                                                  |                               |                              |                               |                                          |                               |
| Prehospitalization variables                   | 0.700 (0.681, 0.719)                                             |                               | 0.710 (0.690, 0.728)         |                               | 0.712 (0.694, 0.731)                     |                               |
| Preoperative variables                         | 0.782 (0.765, 0.799)                                             | <.001 <sup>a</sup>            | 0.787 (0.770, 0.803)         | <0.001 <sup>a</sup>           | 0.804 (0.788, 0.819)                     | <0.001 <sup>a</sup>           |
| Perioperative variables                        | 0.790 (0.773, 0.807)                                             | 0.023 <sup>b</sup>            | 0.808 (0.790, 0.823)         | <0.001 <sup>b</sup>           | 0.817 (0.802, 0.832)                     | <0.001 <sup>b</sup>           |
| RIFLE Acute Kidney Injury                      |                                                                  |                               |                              |                               |                                          |                               |
| Prehospitalization variables                   | 0.669 (0.649, 0.688)                                             |                               | 0.675 (0.656, 0.693)         |                               | 0.676 (0.657, 0.692)                     |                               |
| Preoperative variables                         | 0.748 (0.73, 0.766)                                              | <.001 <sup>a</sup>            | 0.757 (0.740, 0.775)         | <0.001 <sup>a</sup>           | 0.776 (0.758, 0.791)                     | 0.001 <sup>a</sup>            |
| Perioperative variables                        | 0.757 (0.739, 0.775)                                             | 0.014 <sup>b</sup>            | 0.775 (0.759, 0.791)         | <0.001 <sup>b</sup>           | 0.792 (0.776, 0.808)                     | <0.001 <sup>b</sup>           |
| AKIN Acute Kidney Injury                       |                                                                  |                               |                              |                               |                                          |                               |
| Prehospitalization variables                   | 0.698 (0.679, 0.717)                                             |                               | 0.707 (0.688, 0.725)         |                               | 0.711 (0.692, 0.730)                     |                               |
| Preoperative variables                         | 0.782 (0.765, 0.799)                                             | <.001 <sup>a</sup>            | 0.788 (0.772, 0.805)         | <0.001 <sup>a</sup>           | 0.802 (0.786, 0.817)                     | <0.001 <sup>a</sup>           |
| Perioperative variables                        | 0.791 (0.774, 0.808)                                             | 0.026 <sup>b</sup>            | 0.808 (0.793, 0.823)         | <0.001 <sup>b</sup>           | 0.819 (0.804, 0.834)                     | <0.001 <sup>b</sup>           |

**Abbreviations:** AUC, area under the receiver operating characteristic curve; CI, confidence interval; KDIGO, Kidney Disease: Improve Global Outcomes; RIFLE, Risk, Injury, Failure, Loss of kidney function, End stage kidney disease; AKIN, Acute Kidney Injury Network

<sup>a</sup>AUC comparison between prehospitalization and preoperative variables; <sup>b</sup>AUC comparison between preoperative and perioperative variables

Area under the receiver operating characteristic curves (AUC) for each model and acute kidney injury definition are shown for the test set. The AUC, or C-statistic, is calculated along with 95% confidence intervals. DeLong's test is used to test for significant difference between model AUCs after adding additional clinical variables (p <0.001).

**eTable 12. Acute Kidney Injury Risk Stratification Using Alternate Definitions of High Risk in Test Dataset – Rates of Clinical Outcomes by Variable Group**

Because the top 20% was an arbitrary cutoff, we also conducted sensitivity analyses of risk stratification using alternate definitions of High Risk at top 10% and top 30%.

| Gradient Boosting Machine Acute Kidney Injury Model Risk Stratification                                          | Sample (n = 8,494) | Acute Kidney Injury, No. (%) (n = 845) | In-patient Dialysis, No. (%) (n = 32) | Postoperative Length of Stay $\geq 7$ days, No. (%) (n = 1,669) | In-Hospital Death, No. (%) (n = 58) |
|------------------------------------------------------------------------------------------------------------------|--------------------|----------------------------------------|---------------------------------------|-----------------------------------------------------------------|-------------------------------------|
| <b>High Risk defined as the Top 10% of predicted risk. Low Risk defined as the Bottom 90% of predicted risk.</b> |                    |                                        |                                       |                                                                 |                                     |
| Prehospitalization variables                                                                                     |                    |                                        |                                       |                                                                 |                                     |
| High Risk                                                                                                        | 850                | 247 (29.06)                            | 17 (2)                                | 297 (34.94)                                                     | 19 (2.24)                           |
| Low Risk                                                                                                         | 7,644              | 598 (7.82)                             | 15 (0.2)                              | 1,372 (17.95)                                                   | 39 (0.51)                           |
| Preoperative variables                                                                                           |                    |                                        |                                       |                                                                 |                                     |
| High Risk                                                                                                        | 850                | 347 (40.82)                            | 26 (3.06)                             | 421 (49.53)                                                     | 29 (3.41)                           |
| Low Risk                                                                                                         | 7,644              | 498 (6.51)                             | 6 (0.08)                              | 1,248 (16.33)                                                   | 29 (0.38)                           |
| Perioperative variables                                                                                          |                    |                                        |                                       |                                                                 |                                     |
| High Risk                                                                                                        | 850                | 355 (41.76)                            | 28 (3.29)                             | 448 (52.71)                                                     | 34 (4)                              |
| Low Risk                                                                                                         | 7,644              | 490 (6.41)                             | 4 (0.05)                              | 1,221 (15.97)                                                   | 24 (0.31)                           |
| <b>High Risk defined as the Top 20% of predicted risk. Low Risk defined as the Bottom 80% of predicted risk.</b> |                    |                                        |                                       |                                                                 |                                     |
| Prehospitalization variables                                                                                     |                    |                                        |                                       |                                                                 |                                     |
| High Risk                                                                                                        | 1,699              | 378 (22.25)                            | 22 (1.29)                             | 567 (33.37)                                                     | 34 (2)                              |
| Low Risk                                                                                                         | 6,795              | 467 (6.87)                             | 10 (0.15)                             | 1,102 (16.22)                                                   | 24 (0.35)                           |
| Preoperative variables                                                                                           |                    |                                        |                                       |                                                                 |                                     |
| High Risk                                                                                                        | 1,699              | 495 (29.13)                            | 28 (1.65)                             | 738 (43.44)                                                     | 40 (2.35)                           |
| Low Risk                                                                                                         | 6,795              | 350 (5.15)                             | 4 (0.06)                              | 931 (13.7)                                                      | 18 (0.26)                           |
| Perioperative variables                                                                                          |                    |                                        |                                       |                                                                 |                                     |
| High Risk                                                                                                        | 1,699              | 510 (30.02)                            | 30 (1.77)                             | 774 (45.56)                                                     | 51 (3)                              |
| Low Risk                                                                                                         | 6,795              | 335 (4.93)                             | 2 (0.03)                              | 895 (13.17)                                                     | 7 (0.1)                             |
| <b>High Risk defined as the Top 30% of predicted risk. Low Risk defined as the Bottom 70% of predicted risk.</b> |                    |                                        |                                       |                                                                 |                                     |
| Prehospitalization variables                                                                                     |                    |                                        |                                       |                                                                 |                                     |
| High Risk                                                                                                        | 2,548              | 485 (19.03)                            | 24 (0.94)                             | 799 (31.36)                                                     | 36 (1.41)                           |
| Low Risk                                                                                                         | 5,946              | 360 (6.05)                             | 8 (0.13)                              | 870 (14.63)                                                     | 22 (0.37)                           |
| Preoperative variables                                                                                           |                    |                                        |                                       |                                                                 |                                     |
| High Risk                                                                                                        | 2,548              | 595 (23.35)                            | 31 (1.22)                             | 990 (38.85)                                                     | 51 (2)                              |
| Low Risk                                                                                                         | 5,946              | 250 (4.2)                              | 1 (0.02)                              | 679 (11.42)                                                     | 7 (0.12)                            |
| Perioperative variables                                                                                          |                    |                                        |                                       |                                                                 |                                     |
| High Risk                                                                                                        | 2,548              | 606 (23.78)                            | 31 (1.22)                             | 1,002 (39.32)                                                   | 52 (2.04)                           |
| Low Risk                                                                                                         | 5,946              | 239 (4.02)                             | 1 (0.02)                              | 667 (11.22)                                                     | 6 (0.1)                             |

**Abbreviations:** GBM, Gradient Boosting Machines; AKI: acute kidney injury

Risk stratification of gradient boosting machines models in the test set (n = 8,494) using alternate definitions of High Risk. Incidence rates of primary and secondary clinical outcomes were calculated from sample totals. In-patient dialysis was defined using ICD-CM-9 procedure codes (eMethods).

## eReferences

1. Volume 2: ESRD Analytical Methods. *American Journal of Kidney Diseases*. 2018;71(3):S545-S610.
2. van der Laan MJ, Polley EC, Hubbard AE. Super learner. *Stat Appl Genet Mol Biol*. 2007;6:Article25.
3. Bellomo R, Ronco C, Kellum JA, Mehta RL, Palevsky P, Acute Dialysis Quality Initiative w. Acute renal failure - definition, outcome measures, animal models, fluid therapy and information technology needs: the Second International Consensus Conference of the Acute Dialysis Quality Initiative (ADQI) Group. *Crit Care*. 2004;8(4):R204-212.
4. Mehta RL, Kellum JA, Shah SV, et al. Acute Kidney Injury Network: report of an initiative to improve outcomes in acute kidney injury. *Crit Care*. 2007;11(2):R31.
5. Levey AS, Stevens LA, Schmid CH, et al. A new equation to estimate glomerular filtration rate. *Ann Intern Med*. 2009;150(9):604-612.
6. Quan H, Sundararajan V, Halfon P, et al. Coding algorithms for defining comorbidities in ICD-9-CM and ICD-10 administrative data. *Medical care*. 2005;43(11):1130-1139.
7. Clinical Classifications Software (CCS) for CPT. 2017.
8. Schwarze ML, Barnato AE, Rathouz PJ, et al. Development of a list of high-risk operations for patients 65 years and older. *JAMA Surg*. 2015;150(4):325-331.
